# Supplementary material for: Influence of Grain Boundary Scattering on the Field-Effect Mobility of Solid-Phase Crystallized Hydrogenated Polycrystalline In2O3 (In2O3:H)
Source: MDPI journal article supplement (doi:10.3390/nano12172958), 2022-08-26
Supplement: s1 [file s1]

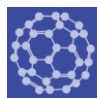

Supplementary Material

# Influence of Grain Boundary Scattering on Field-Effect Mobility of Solid-Phase Crystallized Hydrogenated Polycrystalline $\text{In}_2\text{O}_3$ ( $\text{In}_2\text{O}_3\text{:H}$ )

Yusaku Magari <sup>1,\*</sup>, Wenchang Yeh <sup>1</sup>, Toshiaki Ina <sup>2</sup> and Mamoru Furuta <sup>3</sup><sup>1</sup> Graduate School of Natural Science and Technology, Shimane University, 1060 Nishikawatsu, Matsue 690-8504, Japan<sup>2</sup> Japan Synchrotron Radiation Research Institute (JASRI/SPRING-8), 1-1-1 Kouto, Sayo 679-5198, Japan<sup>3</sup> School of Environmental Science and Engineering and Research Institute, Kochi University of Technology, 185 Miyanokuchi, Tosayamada, Kami 782-8502, Japan

\* Correspondence: magari.yusaku@riko.shimane-u.ac.jp; Tel.: +81-852-32-8903

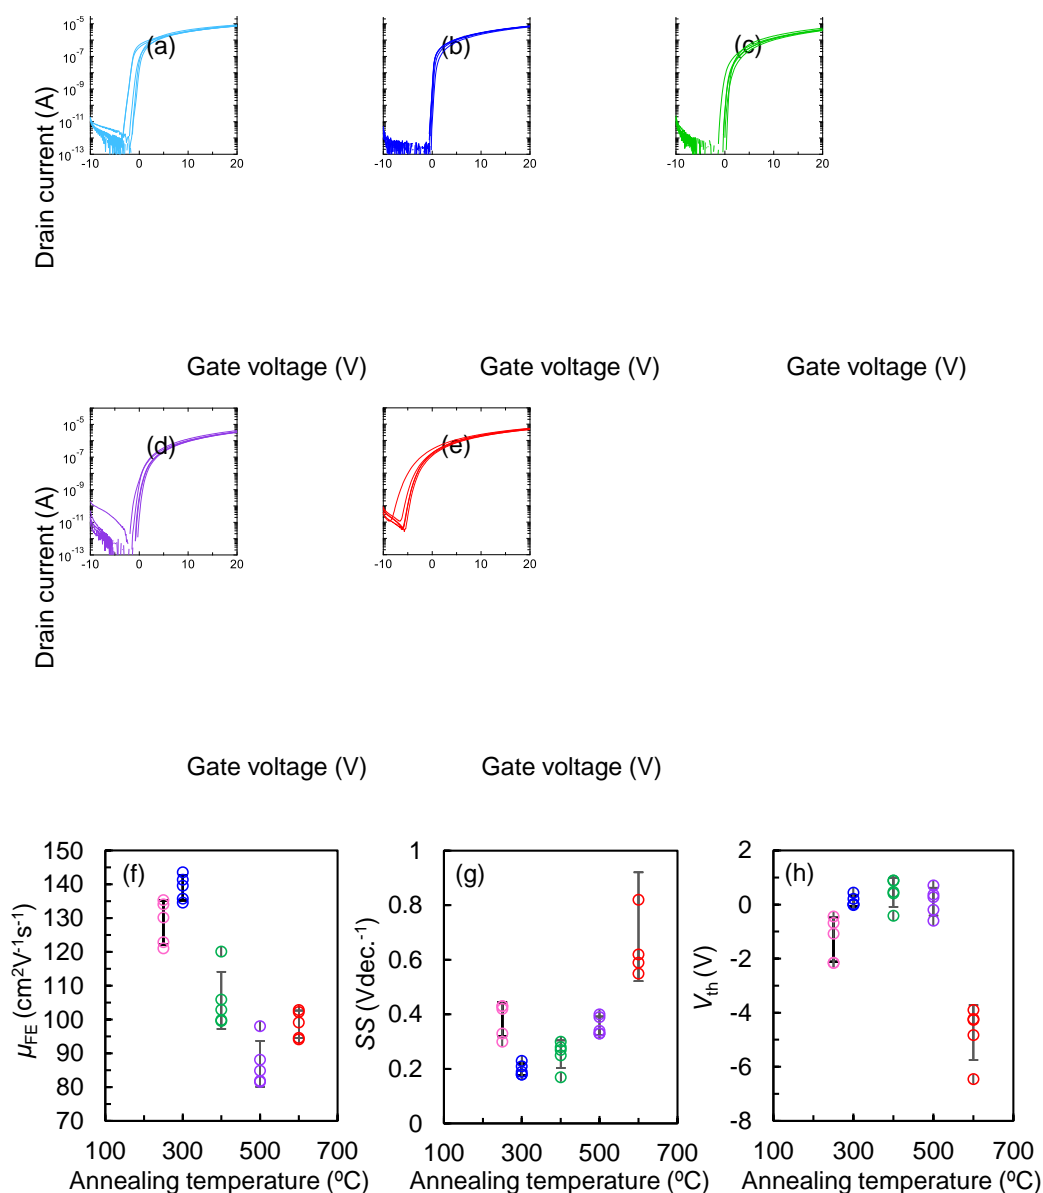

**Figure S1.** Variations of transfer characteristics of the In<sub>2</sub>O<sub>3</sub>:H TFTs with channels annealed at various temperatures; (a) 250 °C, (b) 300 °C, (c) 400 °C, (d) 500 °C, and (e) 600 °C. Five TFTs on the same substrate were measured. Variations of (f)  $\mu_{FE}$ , (g)  $SS$ , and (h)  $V_{th}$  evaluated from five TFTs. ( $V_{ds} = 0.1$  V,  $W/L = 300/300$   $\mu\text{m}$ )

**Table S1.** Summary of the TFT properties. The average values and standard deviations ( $\sigma$ ) of the characteristics of 5 TFTs on the same substrate.  $\sigma$  are shown in parentheses.

| Annealing temperature | $\mu_{FE}$                                  | $SS$                   | $V_{th}$   |
|-----------------------|---------------------------------------------|------------------------|------------|
| (°C)                  | ( $\text{cm}^2\text{V}^{-1}\text{s}^{-1}$ ) | ( $\text{Vdec}^{-1}$ ) | (V)        |
| 250                   | 128.7 (5.9)                                 | 0.38 (0.06)            | −1.3 (0.7) |
| 300                   | 139.0 (3.3)                                 | 0.19 (0.02)            | 0.2 (0.2)  |
| 400                   | 105.7 (7.6)                                 | 0.25 (0.04)            | 0.4 (0.5)  |
| 500                   | 86.9 (6.1)                                  | 0.36 (0.03)            | 0.1 (0.5)  |
| 600                   | 98.5 (3.7)                                  | 0.72 (0.18)            | −4.7 (0.9) |
